# Supplementary material
Source: Springer Nature journal article supplement (http://www.springermedizin.de/resource/supplementary/13075_2010_9695_MOESM6_ESM.pdf/9693554)

# ROM

SMD, 95% CI

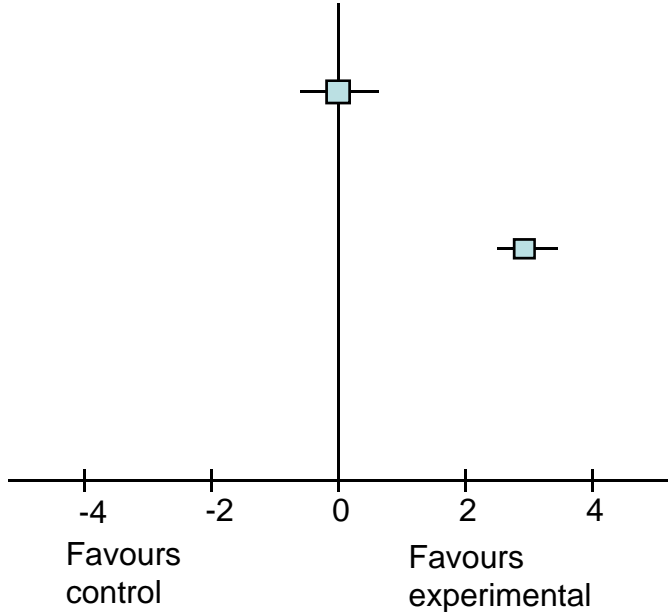

Basford 1987

Rannou 2009

Favours control

Favours experimental

Supplement: MOESM6 [file 9693554]
